1 **Radiological signs supporting idiopathic intracranial hypertension in symptomatic**  
2 **patients with lumbar puncture opening pressure < 250 mm.**

3  
4 Anat Horev \*MD<sup>1</sup>, Tal Eliav\*, MS<sup>5</sup>, Inbal Sherer, MS<sup>2</sup>, Ron Biederko, MS<sup>2</sup>, Gal Ben-Arie,  
5 MD<sup>3</sup>, Ilan Shelef, MD<sup>3</sup>, Yair Zlotnik<sup>1</sup>, Tamir Regev, MD<sup>4</sup>, Erez Tsumi, MD<sup>4</sup> and \*\*Asaf  
6 Honig, MD<sup>1</sup>, \*\*Gili Givaty<sup>6</sup>

7  
8 \*Equal contribution first author

9 \*\* Equal contribution last author

10 <sup>1</sup> Department of Neurology, Soroka University Medical Center, Ben-Gurion University of the  
11 Negev, Beer Sheva, Israel.

12 <sup>2</sup> Joyce and Irving Goldman Medical School, Faculty of Health Sciences, Ben-Gurion  
13 University of the Negev, Beer Sheva, Israel

14 <sup>3</sup> Department of Radiology, Soroka University Medical Center, Ben-Gurion University of the  
15 Negev, Beer Sheva, Israel.

16 <sup>4</sup> Department of Ophthalmology, Soroka University Medical Center, Ben-Gurion University  
17 of the Negev, Beer Sheva, Israel.

18 <sup>5</sup> Faculty of Health Sciences, Ben-Gurion University of the Negev, Beer Sheva, Israel.

19 <sup>6</sup> Barzilai Medical Center, Ashkelon, Israel

20

21

22

23 **Corresponding Author:**

24 Anat Horev, MD

25 Soroka Medical Center

26 Yitzhack I. Rager Blvd 151

27 Beer Sheva, Israel

28 Email: [anathorev@clalit.org.il](mailto:anathorev@clalit.org.il)

29

30 **Conflicting interests:** The author(s) declare no potential conflicts of interest with respect to  
31 the research, authorship, and/or publication of this article.

32

33 **Funding:** This research did not receive any specific grant from funding agencies in the  
34 public, commercial, or not-for-profit sectors.

35

36

37 **Short title:** IIH and opening pressure under 250 mmH<sub>2</sub>O

38

39

40 **Keywords:** Combined conduit score; CSF pressure; idiopathic intracranial hypertension;  
41 transverse sinus stenosis.

42

43

44

45

46

47

48

49

50

51

52

53

54

55

56

47 **Abstract**

48 *Objective* Lumbar puncture opening pressure (LPOP) exceeding 250mmH<sub>2</sub>O stands as a  
49 pivotal criterion in diagnosing idiopathic intracranial hypertension (IIH), according to the  
50 revised Friedman's criteria. However, many studies discuss the variability of LPOP, while  
51 others highlight the accuracy of radiological findings as a credible diagnostic tool for IIH. We  
52 have encountered many symptomatic patients who did not meet the LPOP criteria (with or  
53 without papilledema), despite having IIH-related symptoms and neuroimaging findings. This  
54 study aimed to investigate the radiological findings and clinical symptoms in patients  
55 suspected of having IIH without meeting the LPOP criteria.

56 *Methods* We retrospectively evaluated cerebral venous sinus stenosis using the conduit Farb  
57 score (CFS) as well as other radiological findings suggestive of IIH by computed tomography  
58 venography and magnetic resonance venography in female patients  $\geq 18$  years of age with  
59 chronic headaches and suspected IIH with an LPOP  $< 250$ mm.

60 *Results* Our cohort comprised eighty-eight women (56 with LPOP  $< 200$  mm H<sub>2</sub>O and 32  
61 with LPOP ranging between 200-250 mmH<sub>2</sub>O). Among patients with LPOP in the 200-250  
62 mmH<sub>2</sub>O range, 40% (12 patients) exhibited three or more radiological findings supporting  
63 IIH, compared to 17% (8 patients) in the LPOP  $< 200$  mmH<sub>2</sub>O group ( $p=0.048$ ).

64 Furthermore, cerebral venous stenosis, as measured by a Conduit Farb Score (CFS) of 5 or  
65 lower, was observed in 80% (24 patients) of the LPOP 200-250 mmH<sub>2</sub>O group, contrasting  
66 with 40% (19 patients) in the LPOP  $< 200$  mmH<sub>2</sub>O group ( $p<0.001$ ).

67 *Conclusion* Cerebral venous stenosis, as well as other supportive radiological findings, were  
68 significantly more common in patients with LPOP 200-250 mmH<sub>2</sub>O than LPOP $<200$   
69 mmH<sub>2</sub>O. These findings suggest that given supportive clinical and radiological evidence,  
70 patients with LPOP between 200-250 mmH<sub>2</sub>O, with or without papilledema, may benefit  
71 from treatment for IIH.

## 72 **Introduction**

73           The idiopathic intracranial hypertension diagnosis criteria (IIH) were last revised and  
74 updated in 2013 by Friedman et al.(1). As stated by Friedman et al., one of the most  
75 important criteria is a lumbar puncture opening pressure (LPOP) > 250 mm H<sub>2</sub>O. When the  
76 LPOP is less than 250 and the other criteria are met (evidence of papilledema, normal  
77 cerebrospinal fluid (CSF) profile, normal brain parenchyma without evidence of  
78 hydrocephalus, mass, or structural lesion, and no abnormal meningeal enhancement on MRI),  
79 a diagnosis of IIH is probable but not definite.

80           According to the same guidelines, a diagnosis of IIH without papilledema (IIHWOP)  
81 can be made if LPOP > 250mm H<sub>2</sub>O, with existing unilateral or bilateral abducens palsy and  
82 three out of four positive radiological findings on magnetic resonance venography (MRV):  
83 empty sella, flattening of the posterior aspect of the globe, distention of the preoptic  
84 subarachnoid space with or without a tortuous optic nerve, transverse venous sinus stenosis.  
85 If neither papilledema nor abducens palsy is found, the diagnosis can be suggested in the  
86 presence of the three supporting radiological findings with LPOP > 250 mm. In cases where  
87 LPOP < 250mm H<sub>2</sub>O, the diagnosis is probable only if all other criteria (including  
88 papilledema) are met. Friedman's criteria are considered the gold standard for diagnosis in  
89 most centers today. Since 2013, several studies on IIH have been published, many of which  
90 discuss the inaccuracy of LPOP and how it differs across age, sex, and BMI (2-4) (5-9).

91           Others have noted the variability of IIH and its overlap with chronic headache,  
92 estimating that a significant number of patients experience elevated intracranial pressure  
93 without papilledema(10-15). Although included in Friedman's criteria, newer publications  
94 highlight the accuracy of radiological findings as a diagnostic tool for IIH(16-20).  
95 Morris et al. (21) pointed out the sensitivity of transverse sinus stenosis (TSS) for the  
96 diagnosis of IIH over other imaging findings. Korsbaek et al. (22) proposed that idiopathic

97 intracranial hypertension can be diagnosed if two out of three objective findings are fulfilled:  
98 papilledema, LPOP >250 mm H<sub>2</sub>O, and three neuroimaging signs.

99 We identified a group of patients who did not meet the diagnostic criteria for IIH,  
100 most of whom did not present with papilledema, who lacked an opening pressure greater than  
101 250 mmH<sub>2</sub>O. This group is often diagnosed with chronic headaches or migraines despite  
102 having IIH-related symptoms and neuroimaging findings. Some studies suggest using 200  
103 mmH<sub>2</sub>O LPOP as a criterion or using prolonged manometry(9, 11, 23) to improve the  
104 underdiagnosis of patients, especially without papilledema. We aimed to investigate this  
105 specific population, comparing the radiological findings and clinical symptoms in patients  
106 with LPOP < 200 mmH<sub>2</sub>O to those with LPOP 200-250 mmH<sub>2</sub>O. We hypothesized that  
107 patients with LPOP 200-250 mmH<sub>2</sub>O, when compared with <200 mmH<sub>2</sub>O, would exhibit  
108 significant radiological similarities with IIH. This data could support the possible inclusion of  
109 patients with LPOP 200-250 mmH<sub>2</sub>O in the IIH criteria with additional radiological findings.

## 110 **Methods**

111 This retrospective cohort study was approved by the Soroka University Medical  
112 Center IRB committee (18.12.2016, protocol code 0350-16). Electronic medical records of  
113 patients treated at our institution between 2003 and 2021 were obtained.

### 114 *Patient Selection*

115 We included females  $\geq 18$  years of age with clinical, radiological, and neuro-  
116 ophthalmological suspicion for IIH admitted for completion of workup with lumbar puncture  
117 (LP). Clinical suspicion for IIH was raised in patients complaining of chronic headaches,  
118 with or without visual components (progressive visual field loss, visual obscurations or blurry  
119 vision), and tinnitus. Radiological MRV and computed tomography venography (CTV)  
120 findings suggestive of elevated ICP included scleral flattening, optic nerve sheath dilatation,

121 slit-like ventricles, transverse-sigmoid junction stenosis. Neuro-ophthalmological suspicion  
122 for IIH consisted of new-onset papilledema.

123 Male patients and children under 18 were excluded as we focused on the largest IIH  
124 population: adult women of childbearing age. Patients were also excluded if they had an  
125 abnormal CSF formula on LP and/or opening CSF pressure above 250 mmH<sub>2</sub>O, as they met  
126 the revised Friedman's criteria for diagnosis of IIH. We excluded patients with other  
127 pathological findings on MRV/ CTV that may cause an elevated ICP (space-occupying  
128 lesion, venous thrombosis, etc.) and patients with partial data regarding radiology, LPOP, and  
129 CSF formula.

### 130 *Data collection*

131 CSF opening pressure, recorded headaches, papilledema, and BMI were manually  
132 collected from patients' electronic medical records at the time of diagnosis. Other  
133 demographic information, medical history, and clinical data were automatically extracted  
134 from patient records.

135 The radiological data was collected by a specialized radiologist blinded to the  
136 patients' clinical data, who reviewed their brain CTV/MRV performed closest to the time of  
137 diagnosis. The imaging was categorically graded according to the following criteria: empty  
138 sella turcica (yes/no), scleral flattening (yes/no), optic nerve ectasia over 5 mm (yes/no) and  
139 slit-like ventricles (yes/no). The imaging was also analyzed using the continuous parameters:  
140 1) width of both optic nerves and 2) the degree of bilateral transverse sigmoid junction  
141 venous stenosis (TSS), using the conduit Farb score (CFS)<sup>14</sup>.

142 The patency grading for CFS is performed in each of the transverse sinuses (left and  
143 right) on a scale of 0 to 4, based on the degree of patency: 0 indicates 0% patency, 1 indicates  
144 less than 25% patency, 2 indicates 25-50% patency, 3 indicates 50-75% patency, and 4  
145 indicates 75-100% patency. The scores for each side are combined to calculate the CFS

146 (ranging from 0 to 8). A healthy, normal result is 8, indicating either no or very minimal  
147 patency. A score below 5 is considered indicative of significant stenosis.

148 We suggest the Idiopathic Intracranial Hypertension Radiological Scoring system  
149 (IIHRS) comprising four radiological findings: empty sella, sclera flattening, optic nerve  
150 dural ectasia, and a conduit score of 5 or less. The composite score is determined by  
151 aggregating all positive radiological findings mentioned above. The scoring system was  
152 created specifically to correlate with the revised Friedman's criteria<sup>1</sup>, in which at least 3  
153 positive radiological supporting findings are needed for IIH diagnosis in patients without  
154 papilledema.

#### 155 *Statistical analysis*

156 The statistical analysis tables present data summaries of main variables in the form of  
157 means and standard deviations for normal distributed quantitative variables and medians and  
158 interquartile range (IQR) for non-normal distributed quantitative variables (i.e., the  
159 measurements of the optic nerve sheaths), and percentages for categorical variables. A Mann-  
160 Whitney test was used to compare the FARB score between the two groups. The patient's  
161 medical history, imaging findings such as Empty Sella and Scleral flattening, and the  
162 presence of IIH symptoms such as papilledema and tinnitus were compared between the  
163 study groups using a Pearson chi-square test.

164 Primary analysis of the association between the degree of sinus stenosis (measured in Farb  
165 scale) and cerebrospinal fluid (CSF) opening pressure was constructed using multivariate  
166 Poisson regressions with opening pressure as the dependent variable. Statistical significance  
167 was set at a two-sided  $p < 0.05$  or confidence interval of 95%. Reported p-values were rounded  
168 to three decimals. Statistical analysis was performed using R-studio version 4.1.1 (R-  
169 foundation).

170 **Results**

171 A total of 88 female patients were included: 20 patients with normal BMI (22.4%), 28  
172 patients with BMI between 25-30 (31.4%), and 41 patients with BMI over 30 (46%). Thirty-  
173 two patients with a mean age of 33.3 (10.4) had LPOP 200-250 mmH<sub>2</sub>O, and 56 patients with a  
174 mean age 35.6 (13) had LPOP < 200 mmH<sub>2</sub>O. No differences were found between the two  
175 groups in terms of age at hospitalization, BMI, smoking status, oral contraceptive use, as well  
176 as medical history (Table 1). All patients were women of child bearing age who came to  
177 medical attention because of chronic headaches. No significant difference was found between  
178 groups in other IHH-related symptoms, such as visual complaints and tinnitus (Table 1).

179

180

181

182

183

184

185

186

187

188

189

190

191

192

193

194

**Table 1. Patient characteristics**

|                                             | <b>&lt; 200 mmH<sub>2</sub>O<br/>(N=56)</b> | <b>200-250<br/>mmH<sub>2</sub>O<br/>(N=32)</b> | <b>p-value</b> |
|---------------------------------------------|---------------------------------------------|------------------------------------------------|----------------|
| <b>Age at admission, years</b>              |                                             |                                                |                |
| Mean (SD)                                   | 35.6 (13.0)                                 | 33.3 (10.4)                                    | 0.521          |
| Median [Min, Max]                           | 35.0 [18.0,<br>63.0]                        | 33.0 [18.0,<br>66.0]                           |                |
| <b>BMI, kg/m<sup>2</sup></b>                |                                             |                                                |                |
| Mean (SD)                                   | 29.4 (5.63)                                 | 30.0 (5.75)                                    | 0.627          |
| Median [Min, Max]                           | 28.9 [14.6,<br>43.0]                        | 30.7 [19.9,<br>43.4]                           |                |
| <b>Smoking status n (%)</b>                 |                                             |                                                | 0.291          |
| No                                          | 14 (25.0%)                                  | 7 (21.9%)                                      |                |
| Yes                                         | 13 (23.2%)                                  | 8 (25.0%)                                      |                |
| In the past                                 | 1 (1.8%)                                    | 3 (9.4%)                                       |                |
| <b>Oral contraceptive pills n (%)</b>       |                                             |                                                | 0.895          |
| <b>Psychiatric history n (%)</b>            |                                             |                                                |                |
| Anxiety                                     | 21 (37.5%)                                  | 10 (31.3%)                                     | 0.72           |
| Depression                                  | 14 (25.0%)                                  | 4 (12.5%)                                      | 0.261          |
| Schizophrenia                               | 2 (3.6%)                                    | 0 (0%)                                         | 0.735          |
| Other psychiatric diagnosis                 | 12 (21.4%)                                  | 2 (6.3%)                                       | 0.116          |
| <b>Medical history n (%)</b>                |                                             |                                                |                |
| Congestive heart failure                    | 1 (1.8%)                                    | 0 (0%)                                         | 1              |
| Peripheral vascular disease                 | 1 (1.8%)                                    | 0 (0%)                                         | 1              |
| Cerebrovascular disease                     | 6 (10.7%)                                   | 3 (9.4%)                                       | 1              |
| COPD                                        | 8 (14.3%)                                   | 3 (9.4%)                                       | 0.738          |
| Peptic ulcer disease                        | 3 (5.4%)                                    | 0 (0%)                                         | 0.471          |
| Mild liver disease                          | 3 (5.4%)                                    | 2 (6.3%)                                       | 1              |
| Diabetes                                    | 6 (10.7%)                                   | 3 (9.4%)                                       | 1              |
| Hypertension                                | 9 (16.1%)                                   | 4 (12.5%)                                      | 0.887          |
| <b>Papilledema at hospitalization n (%)</b> |                                             |                                                | 0.407          |
| <b>Tinnitus at hospitalization n (%)</b>    |                                             |                                                | 1              |
| <b>Visual complaints n (%)</b>              |                                             |                                                | 0.215          |
| <b>Visual complaints n (%)</b>              |                                             |                                                | 0.063          |
| Visual obscurations                         | 23 (41.1%)                                  | 16 (50.0%)                                     |                |
| Blurred vision, nonspecific                 | 2 (3.6%)                                    | 0 (0%)                                         |                |
| Other nonspecific visual complaints         | 4(6.2%)                                     | 6 (18.8%)                                      |                |

195 \* p <.05

196



197 Most patients lacked papilledema, with no significant differences found between  
198 groups (62.5% LPOP 200-250 mmH<sub>2</sub>O and 69.9% LPOP<200mmH<sub>2</sub>O, p=0.407).  
199 Neuroradiological findings are presented in Table 2. Among patients with LPOP 200-  
200 250mmH<sub>2</sub>O, 62.5%% exhibited an empty sella compared with 33.9% of those with  
201 LPOP<200 mmH<sub>2</sub>O (p = 0.018). The CFS was significantly lower in the LPOP group of 200-  
202 250mmH<sub>2</sub>O (mean=3.73, SD=1.98) versus the LPOP <200 mmH<sub>2</sub>O group (mean=5.72,  
203 SD=2.35, p-value < 0.001).

204

205

206

207

208

209

210

211

212

213

214

215

216

217

218

219

220

221

**Table 2. Neuroradiological findings**

|                                                        | <b>LPOP&lt; 200<br/>mmH<sub>2</sub>O<br/>(N=56)</b> | <b>LPOP: 200-<br/>250 mmH<sub>2</sub>O<br/>(N=32)</b> | <b>p-value</b> |
|--------------------------------------------------------|-----------------------------------------------------|-------------------------------------------------------|----------------|
| <b>Empty sella n (%)</b>                               | 19 (33.9%)                                          | 20 (62.5%)                                            | 0.018*         |
| <b>Slit-like vent n (%)</b>                            | 9 (16.1%)                                           | 9 (28.1%)                                             | 0.283          |
| <b>Scleral flattening n (%)</b>                        | 5 (8.9%)                                            | 7 (21.9%)                                             | 0.179          |
| <b>Optic nerve dural ectasia n (%)</b>                 | 18 (32.1%)                                          | 17 (53.1%)                                            | 0.1            |
| <b>Optic nerve width, right millimeters</b>            |                                                     |                                                       |                |
| Mean (SD)                                              | 6.28 (0.752)                                        | 6.56 (0.629)                                          | 0.234          |
| Median [Min, Max]                                      | 6.00 [5.00, 8.00]                                   | 6.50 [6.00, 8.00]                                     |                |
| <b>Optic nerve width, left millimeters</b>             |                                                     |                                                       |                |
| Mean (SD)                                              | 6.50 (0.857)                                        | 6.88 (0.619)                                          | 0.109          |
| Median [Min, Max]                                      | 6.00 [5.00, 8.00]                                   | 7.00 [6.00, 8.00]                                     |                |
| <b>Farb score, right</b>                               |                                                     |                                                       |                |
| Mean (SD)                                              | 2.96 (1.32)                                         | 1.77 (1.14)                                           | <0.001*        |
| Median [Min, Max]                                      | 4.00 [0, 4.00]                                      | 1.50 [0, 4.00]                                        |                |
| <b>Farb score, left</b>                                |                                                     |                                                       |                |
| Mean (SD)                                              | 2.77 (1.37)                                         | 1.97 (1.35)                                           | 0.013*         |
| Median [Min, Max]                                      | 3.00 [0, 4.00]                                      | 2.00 [0, 4.00]                                        |                |
| <b>Conduit Farb score (CFS)</b>                        |                                                     |                                                       |                |
| Mean (SD)                                              | 5.72 (2.35)                                         | 3.73 (1.98)                                           | <0.001*        |
| <b>CFS under 5 (significant venous stenosis) n (%)</b> | 19 (40.4%)                                          | 24 (80%)                                              | 0.001*         |
| <b>IIHRS</b>                                           |                                                     |                                                       |                |
| Mean (SD)                                              | 1.09 (1.13)                                         | 2.13 (1.29)                                           | <0.001*        |
| Median [Min, Max]                                      | 1.00 [0, 4.00]                                      | 2.00 [0, 4.00]                                        |                |
| <b>IIHRS above 3 n (%)</b>                             | 8 (14.3%)                                           | 12 (37.5%)                                            | 0.025          |

222 \* p <.05

223

224 Venous sinus stenosis calculated by CFS (<5) was found in 80% of those with LPOP

225 200-250mmH<sub>2</sub>O and 40.4%% of LPOP<200 mmH<sub>2</sub>O (p<0.001). IIHRS was found to be

226 significantly higher in the LPOP 200-250mm H<sub>2</sub>O group (p<0.001). IIHRS score above 3  
227 was found in 37.5% of the LPOP 200-250mm H<sub>2</sub>O group versus 14.3% in the <200 mm H<sub>2</sub>O  
228 group (p=0.025).

229 The results of multiple Poisson regressions are presented in Table 3. We observed a  
230 negative association between CFS and CSF opening pressure (IRR = 0.75; [95% confidence  
231 interval, CI, 0.59-0.94]; p=0.01). Another negative association was found between the CFS  
232 and scleral flattening (IRR = 0.59; [95% confidence interval, CI, 0.38-0.88]; p=0.01). A  
233 negative relationship was found between the CFS and the empty sella, as well, however, it  
234 was not statistically significant (IRR = 0.82; [95% confidence interval, CI, 0.65-1.03];  
235 p=0.09). The association between the CFS and optic nerve dural ectasia showed no difference  
236 (IRR = 1.00; [95% confidence interval, CI, 0.78-1.26]; p=0.9).

**Table 3. Poisson regression model: association between CFS score and patient presentation**

|                                                      | <b>IRR</b> | <b>95% CI</b> | <b>P-value</b> |
|------------------------------------------------------|------------|---------------|----------------|
| <b>CSF opening pressure 200-250 mmH<sub>2</sub>O</b> | 0.75       | 0.59-0.94     | 0.01*          |
| <b>Sclera flattening</b>                             | 0.59       | 0.38-0.88     | 0.01*          |
| <b>Empty sella</b>                                   | 0.82       | 0.65-1.03     | 0.09           |
| <b>Optic nerve dural ectasia</b>                     | 1.00       | 0.78-1.26     | 0.90           |

237 *IRR= Incidence Rate Ratio, CI=Confidence interval*

238 \* p <.05

239

## 240 Discussion

241 In this retrospective study, we analyzed chronic headache patients with suspected IIH  
242 who did not meet Friedman's LPOP criteria >250 mmH<sub>2</sub>O. All 88 participants were women,  
243 56 of whom had an LPOP< 200 mmH<sub>2</sub>O and 32 who had LPOP 200-250 mmH<sub>2</sub>O. Seventy-  
244 seven (87.5%) patients did not have papilledema on presentation. When comparing between  
245 groups, we found that patients with LPOP 200-250 mmH<sub>2</sub>O were significantly more likely to  
246 have an empty sella than those <200mmH<sub>2</sub>O (62.5% versus 33.9%, p=0.018). Our results

247 further demonstrated that 80% of LPOP 200-250 mmH<sub>2</sub>O had CFS values supporting severe  
248 TSS <5 (mean 3.73). In contrast, of those with opening pressure <200 mmH<sub>2</sub>O, only 40.4%  
249 demonstrated severe TSS (<0.001).

250 Farb et al.(17) first described the correlation between venous stenosis and IIH in  
251 2003. He found that 93% of patients with IIH had a combined conduit score less than 5,  
252 indicating severe stenosis. Morris et al.(21) compared TSS in IIH patients to non-IIH patients.  
253 He found that 83% of the IIH patients had bilateral TSS versus 4% of the non-IIH patients  
254 and 53% of the IIH patients had empty sella on MRI versus 5% in non-IIH patients.  
255 Furthermore, 63% of the IIH patients had optic nerve dilatation compared with 4% of the  
256 non-IIH patients.

257 When comparing our study group with LPOP 200-250 mmH<sub>2</sub>O to Morris et al.'s  
258 confirmed IIH patients, we show similar radiological findings (76% with severe VSS, 62.5%  
259 with empty sella and 53.1% with optic nerve dural ectasia). This is in accordance with  
260 existing literature that describes a similar percentage of IIH patients with these imaging  
261 results(16, 23-25), supporting the similarity between patients with 200-250 and >250 LPOP.

262 Although those with LPOP 200-250mmH<sub>2</sub>O (largely IIHWOP) carry very suggestive  
263 clinical and radiological findings of IIH, they do not meet Friedman's criteria.<sup>(1)</sup> According to  
264 the Friedman et al., in patients without papilledema, IIH diagnosis is possible if all other  
265 criteria are met: LPOP>250 mmH<sub>2</sub>O and abducens palsy or three out of four positive  
266 radiological supportive findings: empty sella turcica, scleral flattening, optic nerve dural  
267 ectasia and transverse venous stenosis. In our study we showed that 40% of the LPOP 200-  
268 250 mmH<sub>2</sub>O group had at least three positive radiological findings to support IIH (IIHRS>3).  
269 While we did not find abducens palsy in our patients, it may have been overlooked in some  
270 patients, although it is unclear to what extent.

271 Cerebral venous stenosis is the most sensitive sign for IHH(21, 26{Quan, 2019  
272 #350)(21, 26, 27) and 80% of patients with LPOP 200-250 mmH<sub>2</sub>O in our study had CFS<5,  
273 providing further support that this group, or at least a part of it, should be included as IHH  
274 patients.

275 Prior to the publication of Friedman's revised criteria in 2013, the normal upper limit  
276 for LPOP was defined as 200mmH<sub>2</sub>O by the International Headache Society<sup>(28)</sup>. Three studies  
277 addressed normative values for CSF opening pressure and found average CSF pressure values  
278 of 155, 170, and 193 mmH<sub>2</sub>O<sub>(29-31)</sub>.

279 Norager et al.(32) published a review of the references for LPOP based on six studies,  
280 none of which showed values greater than 200 mm(28). However, evidence has also been  
281 published that supports 250 mmH<sub>2</sub>O as the normal upper limit(29, 30, 33, 34). Many studies  
282 attempted to resolve this uncertainty by discussing fluctuations affecting LPOP(23, 35).

283 Others have suggested that opening pressure is affected by body position, age, BMI,  
284 anesthesia, needle size, and measurement technique(3-7, 31, 36, 37). According to Wang et  
285 al. 12.5% of patients showed an increase of more than 50mm on LPs repeated within 2.5  
286 years(31). This was also seen in a study by Kilgore et al. who showed significant differences  
287 in LPOP on repeated tests(8). Together, these studies suggest a high range of variability and  
288 inaccuracy of a test that is both uncomfortable for the patient and carries a significant risk of  
289 complication(32, 38).

290 Bono et al. showed that an hour-long CSF manometry could be considerably more  
291 informative than recording a single spot opening pressure. They further showed that,  
292 especially in patients with bilateral venous stenosis, the LPOP may be less than 250 mmH<sub>2</sub>O  
293 but can reach higher pressures if monitored for 60 minutes(23). A review of 27 LPOP studies  
294 found that it was highly variable amongst patients and concluded that using a single value of  
295 ICP to distinguish normal values from pathological ones may not be biologically natural(32).

296 Our study highlights a significant patient population with LPOP between 200-250  
297 mmH<sub>2</sub>O who have radiological and clinical findings supporting the diagnosis of IIH, most of  
298 whom had no papilledema at presentation. This population is not diagnosed with IIH and is  
299 therefore not treated accordingly. It is important to note that in the group of patients with  
300 LPOP <200H<sub>2</sub>O, a non-negligible number of patients had supportive radiological findings for  
301 IIH (although found to be significantly less common).

302 Multiple studies support the accuracy of radiological findings in the diagnosis of IIH.  
303 The most accurate findings were found to be VSS, empty sella, and scleral flattening(19, 20,  
304 22, 26, 39, 40). It was also published that up to 48% of chronic headache sufferers have  
305 bilateral cerebral venous stenosis(41, 42). Is very likely that our cohort supports the  
306 underdiagnosis of IIH in patients with chronic headaches and cerebral venous stenosis that  
307 did not undergo lumbar punctures. This population is likely to have elevated intracranial  
308 pressure that is undiagnosed and, therefore, undertreated. Recent data suggests that it is  
309 advantageous to consider IIH on a spectrum(13, 43, 44). This is backed by the importance of  
310 the radiological findings and uncertainties surrounding the accuracy of the LPOP.  
311 Consequently, we, alongside many other researchers, propose revising the diagnostic criteria  
312 for IIH.

313 We present the first recent study directly comparing patients with suspected IIH and  
314 an LPOP of 200-250 mmH<sub>2</sub>O to those with pressures <200 mmH<sub>2</sub>O. While this group has  
315 been mentioned in some studies, it has not been their primary focus. Although retrospective  
316 and based on a small cohort, our research brings attention to a subpopulation that may be  
317 experiencing IIH. This specific population may be underdiagnosed and, therefore, may  
318 benefit from treatment of IIH. Further large-scale studies are needed to support our  
319 conclusions.

320

## 321 **References**

- 322 1. Friedman DI, Jacobson DM. Diagnostic criteria for idiopathic intracranial  
323 hypertension. *Neurology*. 2002;59(10):1492-5.
- 324 2. Bø SH, Lundqvist C. Cerebrospinal fluid opening pressure in clinical practice - a  
325 prospective study. *J Neurol*. 2020;267(12):3696-701.
- 326 3. Schwartz R, Kliper E, Stern N, Dotan G, Berliner S, Kesler A. The obesity pattern of  
327 idiopathic intracranial hypertension in men. *Graefe's archive for clinical and experimental*  
328 *ophthalmology = Albrecht von Graefes Archiv fur klinische und experimentelle*  
329 *Ophthalmologie*. 2013;251(11).
- 330 4. Abel AS, Brace JR, McKinney AM, Friedman DI, Smith SD, Westesson PL, et al.  
331 Effect of patient positioning on cerebrospinal fluid opening pressure. *J Neuroophthalmol*.  
332 2014;34(3):218-22.
- 333 5. Pedersen SH, Andresen M, Lilja-Cyron A, Petersen LG, Juhler M. Lumbar puncture  
334 position influences intracranial pressure. *Acta Neurochir (Wien)*. 2021;163(7):1997-2004.
- 335 6. Sithinamsuwan P, Sithinamsuwan N, Tejavaniya S, Udommongkol C, Nidhinandana  
336 S. The effect of whole body position on lumbar cerebrospinal fluid opening pressure.  
337 *Cerebrospinal Fluid Res*. 2008;5:11.
- 338 7. Eidlitz-Markus T, Stiebel-Kalish H, Rubin Y, Shuper A. CSF pressure measurement  
339 during anesthesia: an unreliable technique. *Paediatr Anaesth*. 2005;15(12):1078-82.
- 340 8. Kilgore KP, Bhatti MT, Cutsforth-Gregory JK, Hodge DO, Chen JJ. Variability of  
341 Consecutive Lumbar Puncture Opening Pressures. *J Neuroophthalmol*. 2020;40(4):494-7.
- 342 9. Machiele R, Frankfort BJ, Killer HE, Fleischman1 D. Problems in CSF and  
343 Ophthalmic  
344 Disease Research. *Frontiers in Ophthalmology*2022.

- 345 10. Sengupta S, Vidwan J. Overlap and Differences in Migraine and Idiopathic  
346 Intracranial Hypertension. *Curr Pain Headache Rep.* 2023.
- 347 11. Torbey MT, Geocadin RG, Razumovsky AY, Rigamonti D, Williams MA. Utility of  
348 CSF pressure monitoring to identify idiopathic intracranial hypertension without papilledema  
349 in patients with chronic daily headache. *Cephalalgia.* 2004;24(6):495-502.
- 350 12. De Simone R, Ranieri A. Commentary: Idiopathic Intracranial Hypertension Without  
351 Papilledema (IIHWOP) in Chronic Refractory Headache. *Front Neurol.* 2019;10:39.
- 352 13. Chen BS, Britton JOT. Expanding the clinical spectrum of idiopathic intracranial  
353 hypertension. *Curr Opin Neurol.* 2023;36(1):43-50.
- 354 14. Favoni V, Pierangeli G, Toni F, Cirillo L, La Morgia C, Abu-Rumeileh S, et al.  
355 Idiopathic Intracranial Hypertension Without Papilledema (IIHWOP) in Chronic Refractory  
356 Headache. *Front Neurol.* 2018;9:503.
- 357 15. Mollan SP, Chong YJ, Grech O, Sinclair AJ, Wakerley BR. Current Perspectives on  
358 Idiopathic Intracranial Hypertension without Papilloedema. *Life (Basel).* 2021;11(6).
- 359 16. Agid R, Farb RI, Willinsky RA, Mikulis DJ, Tomlinson G. Idiopathic intracranial  
360 hypertension: the validity of cross-sectional neuroimaging signs. *Neuroradiology.*  
361 2006;48(8):521-7.
- 362 17. Farb RI, Vanek I, Scott JN, Mikulis DJ, Willinsky RA, Tomlinson G, et al. Idiopathic  
363 intracranial hypertension: the prevalence and morphology of sinovenous stenosis. *Neurology.*  
364 2003;60(9):1418-24.
- 365 18. Kuzan BN, Ilgın C, Kuzan TY, Dericioğlu V, Kahraman-Koytak P, Uluç K, et al.  
366 Accuracy and reliability of magnetic resonance imaging in the diagnosis of idiopathic  
367 intracranial hypertension. *Eur J Radiol.* 2022;155:110491.



- 368 19. Mallery RM, Friedman DI, Digre KB, Liu GT. Utility of Magnetic Resonance  
369 Imaging Features for Improving the Diagnosis of Idiopathic Intracranial Hypertension  
370 Without Papilledema: Response. *J Neuroophthalmol.* 2019;39(3):439.
- 371 20. Maralani PJ, Hassanlou M, Torres C, Chakraborty S, Kingstone M, Patel V, et al.  
372 Accuracy of brain imaging in the diagnosis of idiopathic intracranial hypertension. *Clin*  
373 *Radiol.* 2012;67(7):656-63.
- 374 21. Morris PP, Black DF, Port J, Campeau N. Transverse Sinus Stenosis Is the Most  
375 Sensitive MR Imaging Correlate of Idiopathic Intracranial Hypertension. *AJNR Am J*  
376 *Neuroradiol.* 2017;38(3):471-7.
- 377 22. Korsbaek JJ, Jensen RH, Hogedal L, Molander LD, Hagen SM, Beier D. Diagnosis of  
378 idiopathic intracranial hypertension: A proposal for evidence-based diagnostic criteria.  
379 *Cephalalgia.* 2023;43(3):3331024231152795.
- 380 23. Bono F, Curcio M, Rapisarda L, Vescio B, Bombardieri C, Mangialavori D, et al.  
381 Cerebrospinal Fluid Pressure-Related Features in Chronic Headache: A Prospective Study  
382 and Potential Diagnostic Implications. *Front Neurol.* 2018;9:1090.
- 383 24. Raggi A, Bianchi Marzoli S, Ciasca P, Cammarata G, Melzi L, Chiapparini L, et al.  
384 The Pre-Lumbar puncture Intracranial Hypertension Scale (PLIHS): A practical scale to  
385 identify subjects with normal cerebrospinal fluid pressure in the management of idiopathic  
386 intracranial hypertension. *J Neurol Sci.* 2021;429:118058.
- 387 25. Bidot S, Saindane AM, Peragallo JH, Bruce BB, Newman NJ, Biousse V. Brain  
388 Imaging in Idiopathic Intracranial Hypertension. *J Neuroophthalmol.* 2015;35(4):400-11.
- 389 26. Kwee RM, Kwee TC. Systematic review and meta-analysis of MRI signs for  
390 diagnosis of idiopathic intracranial hypertension. *Eur J Radiol.* 2019;116:106-15.

- 391 27. Quan T, Ren Y, Lin Y, Guan S, Hou H, Yan B, et al. Role of contrast-enhanced  
392 magnetic resonance high-resolution variable flip angle turbo-spin-echo (T1 SPACE)  
393 technique in diagnosis of transverse sinus stenosis. *Eur J Radiol.* 2019;120:108644.
- 394 28. Society HCSotIH. The International Classification of Headache Disorders: 2nd  
395 edition. *Cephalalgia.* 2004;24 Suppl 1:9-160.
- 396 29. Bø SH, Davidsen EM, Benth JS, Gulbrandsen P, Dietrichs E. Cerebrospinal fluid  
397 opening pressure measurements in acute headache patients and in patients with either chronic  
398 or no pain. *Acta Neurol Scand Suppl.* 2010(190):6-11.
- 399 30. Whiteley W, Al-Shahi R, Warlow CP, Zeidler M, Lueck CJ. CSF opening pressure:  
400 reference interval and the effect of body mass index. *Neurology.* 2006;67(9):1690-1.
- 401 31. Wang F, Lesser ER, Cutsforth-Gregory JK, Bhatti MT, Kilgore KP, Hodge DO, et al.  
402 Population-Based Evaluation of Lumbar Puncture Opening Pressures. *Front Neurol.*  
403 2019;10:899.
- 404 32. Norager NH, Olsen MH, Pedersen SH, Riedel CS, Czosnyka M, Juhler M. Reference  
405 values for intracranial pressure and lumbar cerebrospinal fluid pressure: a systematic review.  
406 *Fluids Barriers CNS.* 2021;18(1):19.
- 407 33. Fleischman D, Berdahl JP, Zaydlarova J, Stinnett S, Fautsch MP, Allingham RR.  
408 Cerebrospinal fluid pressure decreases with older age. *PLoS One.* 2012;7(12):e52664.
- 409 34. Lee SC, Lueck CJ. Cerebrospinal fluid pressure in adults. *J Neuroophthalmol.*  
410 2014;34(3):278-83.
- 411 35. Bono F, Salvino D, Tallarico T, Cristiano D, Condino F, Fera F, et al. Abnormal  
412 pressure waves in headache sufferers with bilateral transverse sinus stenosis. *Cephalalgia.*  
413 2010;30(12):1419-25.

- 414 36. Yücel D, Ülgen Y. A novel approach to CSF pressure measurement via lumbar  
415 puncture that shortens the measurement time with a high level of accuracy. *BMC Neurosci.*  
416 2023;24(1):34.
- 417 37. Silberstein SD, Corbett JJ. The forgotten lumbar puncture. *Cephalalgia.*  
418 1993;13(3):212-3.
- 419 38. Duits FH, Martinez-Lage P, Paquet C, Engelborghs S, Lleó A, Hausner L, et al.  
420 Performance and complications of lumbar puncture in memory clinics: Results of the  
421 multicenter lumbar puncture feasibility study. *Alzheimers Dement.* 2016;12(2):154-63.
- 422 39. Barkatullah AF, Leishangthem L, Moss HE. MRI findings as markers of idiopathic  
423 intracranial hypertension. *Curr Opin Neurol.* 2021;34(1):75-83.
- 424 40. Hoffmann J, Mollan SP, Paemeleire K, Lampl C, Jensen RH, Sinclair AJ. European  
425 headache federation guideline on idiopathic intracranial hypertension. *J Headache Pain.*  
426 2018;19(1):93.
- 427 41. Bono F, Messina D, Giliberto C, Cristiano D, Broussard G, D'Asero S, et al. Bilateral  
428 transverse sinus stenosis and idiopathic intracranial hypertension without papilledema in  
429 chronic tension-type headache. *J Neurol.* 2008;255(6):807-12.
- 430 42. De Simone R, Ranieri A, Montella S, Erro R, Fiorillo C, Bonavita V. Sinus venous  
431 stenosis-associated IIHWOP is a powerful risk factor for progression and refractoriness of  
432 pain in primary headache patients: a review of supporting evidences. *Neurol Sci.* 2011;32  
433 Suppl 1:S169-71.
- 434 43. Biousse V, Newman NJ. The expanding spectrum of idiopathic intracranial  
435 hypertension. *Eye (Lond).* 2023;37(12):2361-4.
- 436 44. Fargen KM, Coffman S, Torosian T, Brinjikji W, Nye BL, Hui F. "Idiopathic"  
437 intracranial hypertension: An update from neurointerventional research for clinicians.  
438 *Cephalalgia.* 2023;43(4):3331024231161323.

439 **Statement of authorship**

440 Conception and design: Horev, Eliav, Honig

441 Drafting of manuscript: Horev, Eliav, Sherer, Givaty

442 Data collection and analysis: Biederko, Ben-Arie, Shelef, Regev, Tsumi

443 Critical revision: Horev, Eliav, Honig, Zlotnik

444 All authors approved the final manuscript.
